# Supplementary material for: Seabuckthorn polysaccharide ameliorates high-fat diet-induced obesity by gut microbiota-SCFAs-liver axis
Source: Royal Society of Chemistry journal article supplement (doi:10.1039/d1fo03147c), 2021-12-21
Supplement: d1fo03147c1.pdf [file d1fo03147c1.pdf]

**Seabuckthorn polysaccharide ameliorates high-fat diet-induced  
obesity by gut microbiota-SCFAs-liver axis**

Ying Lan<sup>†</sup>, Qingyang Sun<sup>†</sup>, Zhiyuan Ma<sup>†</sup>, Jing Peng<sup>†</sup>, Mengqi Zhang<sup>†</sup>, Chi Wang<sup>‡</sup>,  
Xiaotian Zhang<sup>‡</sup>, Xianfang Yan<sup>‡</sup>, Lili Chang<sup>†</sup>, Xinglin Hou<sup>†</sup>, Ruixue Qiao<sup>†</sup>, Aiziguli  
Mulati<sup>†</sup>, Yuan Zhou<sup>†</sup>, Qiang Zhang<sup>†</sup>, Zhigang Liu<sup>\*,†</sup>, Xuebo Liu<sup>\*,†</sup>

<sup>†</sup>*Laboratory of Functional Chemistry and Nutrition of Food, College of Food Science and  
Engineering, Northwest A&F University, Yangling, China*

<sup>‡</sup>*College of Animal Science and Technology, Northwest A&F University, Yangling, China*

\* Correspondence authors:

Dr. Zhigang Liu, E-mail: [Zhigangliu@nwsuaf.edu.cn](mailto:Zhigangliu@nwsuaf.edu.cn)

Prof. Xuebo Liu, E-mail: [Xueboliu@nwsuaf.edu.cn](mailto:Xueboliu@nwsuaf.edu.cn)

**Table S1 Composition and Calories in Diet**

|                   | RC      | HFD   |
|-------------------|---------|-------|
| Ingredient (g/kg) |         |       |
| Casein            | 200     | 267   |
| Corn starch       | 397.486 | 0     |
| Dextrin           | 132     | 157   |
| Sucrose           | 100     | 89    |
| Soybean oil       | 70      | 33    |
| Cellulose         | 50      | 67    |
| Minerals          | 35      | 66    |
| Vitamin           | 10      | 13    |
| L-Cysteine        | 3.0     | 4     |
| Choline chloride  | 2.5     | 3     |
| TBHQ              | 0.014   | 0.067 |
| Lard              | 0       | 301   |
| SP                | 0       | 0     |
| Total             | 1000    | 1000  |
|                   | kcal%   | kcal% |
| Protein           | 19      | 19.4  |
| Carbohydrate      | 64      | 20.6  |
| Fat               | 17      | 60    |

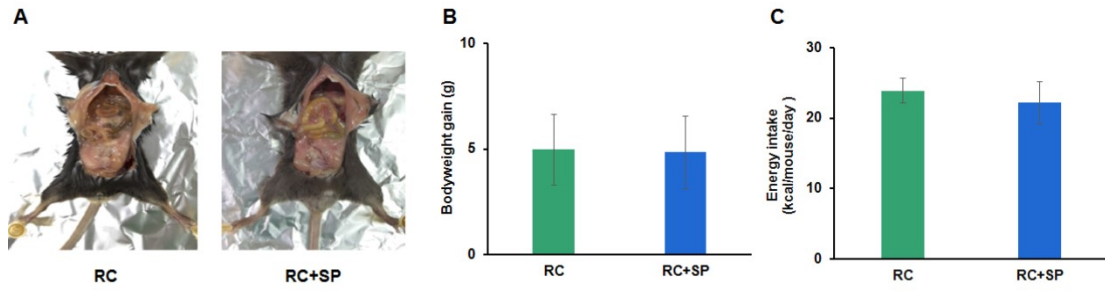

22

23 Figure S1. Effects of SP treatment in regular chow fed mice. A) Representative  
 24 anatomical image of mice; B) body weight gain; C) energy intake. Data are presented  
 25 as mean  $\pm$  SEM,  $n = 10$ . The regular chow (RC) group was fed with a normal diet, and  
 26 the SP treatment (RC+SP) group was fed with RC containing 0.1% w/w SP. 10 mice  
 27 per group, the mice were fed continuously for 12 weeks. Food intake were recorded  
 28 every 2 days, and the body weight was recorded every 5 days.
